# Supplementary material for: Genetic transformation of Spizellomyces punctatus, a resource for studying chytrid biology and evolutionary cell biology
Source: eLife. 2020 May 11;9:e52741. doi: 10.7554/eLife.52741 (PMC7213984; doi:10.7554/eLife.52741)
Supplement: Figure 2—figure supplement 5—source data 1. [file elife-52741-fig2-figsupp5-data1.xlsx]

## Sheet: EM20C-1 Replica 1
Cell-Position	tg	t1	t2	t3	t4	t5	t6	t7	t8	tb
Cell1	72	546	696	849	1005	1170	1329	NA	NA	1719
Cell2A	63	468	579	729	876	1044	1233	1401	1527	1755
Cell2B	66	489	660	786	939	1104	1251	1371	NA	1725
Cell3	75	540	669	807	957	1107	1239	1347	NA	1638
Cell4A	81	552	666	792	933	1104	1233	1344	NA	1602
Cell4B	NA	525	666	816	963	1113	1269	1386	1491	1692
Cell5	63	525	651	756	882	1038	1185	1320	1428	1725
Cell6	69	516	654	798	966	1149	1314	1455	1581	1854
Cell7	93	519	636	762	897	1056	NA	NA	NA	1632
Cell8	90	528	678	819	1011	1200	1584	1878	NA	NA
Cell9A	93	507	645	789	933	1095	1281	1446	NA	1767
Cell9B	90	498	636	786	930	1101	1242	NA	NA	1740
Cell9C	NA	NA	NA	NA	NA	NA	NA	NA	NA	NA
Cell10A	54	444	564	732	891	1074	1236	1386	1503	1692
Cell10B	132	519	657	801	954	1098	1227	1338	NA	1590
Cell11A	90	531	666	825	975	1140	1320	NA	NA	NA
Cell11B	81	483	633	786	933	1062	1164	NA	NA	1446
Cell11C	60	528	666	825	1035	1269	NA	NA	NA	1863
Cell11D	63	528	678	825	981	1125	1245	NA	NA	1584

## Sheet: EM20C-1 Replica 2
Cell-Position	tg	t1	t2	t3	t4	t5	t6	t7	t8	tb
Cell1	158	608	744	882	1032	1168	1286	1386	NA	1552
Cell2A	136	568	700	836	992	1142	1266	1374	1444	1562
Cell2B	NA	NA	NA	NA	NA	NA	NA	NA	NA	NA
Cell3A	80	520	654	808	958	1100	1210	1314	1378	1480
Cell3B	160	642	780	940	1086	1230	1348	1446	NA	1596
Cell3C	NA	706	872	1020	1162	1320	1456	1578	1666	1800
Cell3D	NA	NA	NA	NA	NA	NA	NA	NA	NA	NA
Cell4A	NA	646	790	932	1084	1254	1384	1496	NA	1700
Cell4B	NA	648	764	916	1082	1248	1390	1512	1600	1744
Cell5	130	582	710	854	1032	1208	1346	1458	1534	1648
Cell6A	132	584	728	862	1030	1172	1298	1400	1470	1580
Cell6B	148	678	826	964	1128	1278	1402	1510	1596	1732
Cell6C	NA	728	866	1006	1162	1290	1400	1496	NA	1638
Cell7A	172	628	772	932	1096	1256	1392	1510	1596	1716
Cell7B	364	696	838	988	1178	1308	1418	1500	NA	1616
Cell8	NA	604	762	902	1068	1214	1334	1438	NA	1624

## Sheet: EM20C-2 Replica 1
Cell-Position	tg	t1	t2	t3	t4	t5	t6	t7	t8	tb
Cell1	NA	430	542	684	840	982	1112	1202	NA	1374
Cell2	NA	NA	NA	NA	NA	NA	NA	NA	NA	NA
Cell3	NA	430	568	708	848	1004	1170	1296	1372	1500
Cell4	NA	NA	NA	NA	NA	NA	NA	NA	NA	NA
Cell5A	NA	680	942	1238	1420	1532	NA	NA	NA	1778
Cell5B	NA	522	672	832	1016	1194	1348	1432	1508	1610
Cell6	NA	474	634	786	956	1122	1252	1328	1394	1486
Cell7	NA	390	530	654	800	940	1046	1118	NA	1242
Cell8	NA	406	516	654	800	946	1076	1158	NA	1298
Cell9A	NA	1514	1686	1820	1950	2034	NA	NA	NA	NA
Cell9B	NA	462	580	738	868	998	1114	1186	NA	1318
Cell10	NA	510	648	800	978	1126	1248	1330	NA	1470
Cell11A	NA	552	680	802	950	1086	1204	1276	1330	1412
Cell11B	NA	598	722	874	1024	1160	1272	NA	NA	NA
Cell12A	NA	NA	NA	NA	NA	NA	NA	NA	NA	NA
Cell12B	NA	438	568	762	1030	1166	1262	NA	NA	NA
Cell13	NA	NA	NA	NA	NA	NA	NA	NA	NA	NA
Cell14A	NA	426	552	684	822	978	1110	1190	NA	1336
Cell14B	NA	406	528	654	812	962	1082	1154	NA	1284
Cell15	NA	476	648	804	972	1146	1302	1386	1456	1546

## Sheet: EM20C-2 Replica 2
Cell.Position	tg	t1	t2	t3	t4	t5	t6	t7	t8	tb
Cell1A	138	624	782	952	1046	1112	NA	NA	NA	1220
Cell1B	NA	NA	NA	NA	NA	NA	NA	NA	NA	NA
Cell1C	50	528	674	822	976	1076	1146	NA	NA	1256
Cell1D	52	554	668	836	988	1116	1196	NA	NA	1328
Cell2A	98	568	708	852	988	1102	1170	NA	NA	1274
Cell2B	116	554	706	848	974	1070	1142	NA	NA	1254
Cell2C	132	604	756	892	1020	1112	1176	NA	NA	1266
Cell3A	NA	NA	NA	NA	NA	NA	NA	NA	NA	NA
Cell3B	54	428	576	716	844	922	986	NA	NA	1076
Cell3C	NA	682	858	992	1110	1176	NA	NA	NA	1306
Cell3D	58	522	654	776	920	1012	NA	NA	NA	1170
Cell3E	NA	874	1036	1204	1318	1400	NA	NA	NA	1544
Cell4A	12	590	764	946	1170	1426	1572	NA	NA	1774
Cell4B	NA	626	746	898	1072	1208	1284	NA	NA	1424
Cell4C	NA	1058	1182	1266	NA	NA	NA	NA	NA	1408
Cell4D	NA	NA	NA	NA	NA	NA	NA	NA	NA	NA
Cell5A	NA	604	792	934	1008	1074	NA	NA	NA	1164
Cell5B	NA	598	764	908	1010	1076	NA	NA	NA	1186
Cell5C	110	660	842	996	1114	1194	NA	NA	NA	1334
Cell5D	74	584	772	944	1080	1162	NA	NA	NA	1302
Cell5E	94	790	936	1078	1176	1242	NA	NA	NA	1374
Cell6A	194	582	726	856	970	1044	NA	NA	NA	1184
Cell6B	38	584	734	880	1024	1118	1184	NA	NA	1286
Cell6C	10	484	614	762	892	1006	1076	NA	NA	1202
Cell7A	NA	650	788	944	1096	1196	1264	NA	NA	1372
Cell7B	78	546	692	858	1034	1164	1242	NA	NA	1382
Cell7C	NA	606	1052	NA	NA	NA	NA	NA	NA	NA
Cell7D	234	822	952	1110	1278	1372	NA	NA	NA	1522
Cell7E	106	614	820	NA	NA	NA	NA	NA	NA	NA
Cell7F	NA	NA	NA	NA	NA	NA	NA	NA	NA	NA
Cell8	NA	722	866	1020	1190	1372	1476	NA	NA	1640
Cell9A	NA	NA	NA	NA	NA	NA	NA	NA	NA	NA
Cell9B	NA	542	712	876	1044	1144	1216	NA	NA	1328
Cell9C	NA	NA	NA	NA	NA	NA	NA	NA	NA	NA
Cell10A	NA	716	880	1046	1194	1288	1354	NA	NA	1458
Cell10B	136	NA	NA	NA	NA	NA	NA	NA	NA	NA
Cell10C	54	626	786	940	1032	1098	NA	NA	NA	1216
Cell10D	NA	NA	NA	NA	NA	NA	NA	NA	NA	NA
Cell11A	58	574	722	906	1056	1146	NA	NA	NA	1292
Cell11B	NA	NA	NA	NA	NA	NA	NA	NA	NA	NA
Cell11C	70	566	706	852	996	1086	NA	NA	NA	1238
Cell12A	66	986	1176	1274	NA	NA	NA	NA	NA	1488
Cell12B	274	774	972	1158	1276	1376	NA	NA	NA	1526
Cell12C	64	514	646	790	948	1110	1200	NA	NA	1340
Cell13A	118	648	796	938	1060	1208	1320	NA	NA	1486
Cell13B	782	1234	1418	1666	NA	NA	NA	NA	NA	1956
Cell13C	118	1586	NA	NA	NA	NA	NA	NA	NA	NA
Cell13D	154	524	670	802	924	1000	1062	NA	NA	1138
Cell13E	72	536	678	824	958	1066	NA	NA	NA	1244
Cell14A	NA	666	820	1004	1194	1346	1432	NA	NA	1586
Cell14B	64	562	684	832	1002	1128	1206	NA	NA	1338
Cell15A	NA	652	826	1004	1124	1208	NA	NA	NA	1370
Cell15B	120	656	812	964	1130	1232	NA	NA	NA	1382
Cell15C	134	628	794	950	1112	1216	1286	NA	NA	1402
Cell16A	80	622	768	936	1096	1206	1276	NA	NA	1386
Cell16B	NA	NA	NA	NA	NA	NA	NA	NA	NA	NA
Cell16C	82	554	680	848	992	1104	1178	NA	NA	1308
Cell16D	NA	620	734	868	1006	1084	1150	NA	NA	1248
Cell16E	36	552	674	784	870	936	NA	NA	NA	1024
Cell17A	142	660	814	980	1162	1286	1356	NA	NA	1474
Cell17B	42	NA	NA	NA	NA	NA	NA	NA	NA	NA
Cell17C	38	524	662	810	948	1032	1098	NA	NA	1188
Cell18A	NA	NA	NA	NA	NA	NA	NA	NA	NA	NA
Cell18B	86	636	786	1076	1330	NA	NA	NA	NA	NA
Cell18C	86	702	874	1012	1152	1244	1304	NA	NA	1398
Cell19A	NA	500	684	832	976	1112	1194	NA	NA	1336
Cell19B	NA	582	762	940	1124	1314	1438	NA	NA	1630
