# Supplementary material for: Genetic transformation of Spizellomyces punctatus, a resource for studying chytrid biology and evolutionary cell biology
Source: eLife. 2020 May 11;9:e52741. doi: 10.7554/eLife.52741 (PMC7213984; doi:10.7554/eLife.52741)
Supplement: Figure 3—source data 1. — Data was used to create Figure 3A and analyzed to create Figure 3B. [file elife-52741-fig3-data1.xlsx]

## Sheet: Sheet1
Time	Nuclei (Cell 1)	Nuclei (Cell 2)	Nuclei (Cell 3)	Nuclei (Cell 4)	Nuclei (Cell 5)	Nuclei (Cell 6)
0	1			1	1	1
1	1			1	1	1
2	1			1	1	1
3	1			1	1	1
4	1			1	1	1
5	1			1	1	1
6	1			1	1	1
7	1			1	1	1
8	1			1	1	1
9	1			1	1	1
10	1			1	1	1
11	1			1	1	1
12	1			1	1	1
13	1			1	1	1
14	1			1	1	1
15	1			1	1	1
16	1			1	1	1
17	1			1	1	1
18	1			1	1	1
19	1			1	1	1
20	1			1	1	1
21	1			1	1	1
22	1			1	1	1
23	1			1	1	1
24	1			1	1	1
25	1			1	1	1
26	1			1	1	1
27	1			1	1	1
28	1			1	1	1
29	1			1	1	1
30	1			1	1	1
31	1			1	1	1
32	1			1	1	1
33	1			1	1	1
34	1			1	1	1
35	1			1	1	1
36	1			1	1	1
37	1			1	1	1
38	1			1	1	1
39	1			1	1	1
40	1			1	1	1
41	1			1	1	1
42	1			1	1	1
43	1			1	1	1
44	1			1	1	1
45	1			1	1	1
46	1			1	1	1
47	1			1	1	1
48	1			1	1	1
49	1			1	1	1
50	1			1	1	1
51	1			1	1	1
52	1			1	1	1
53	1			1	1	1
54	1			1	1	1
55	1			1	1	1
56	1			1	1	1
57	1			1	1	1
58	1			1	1	1
59	1			1	1	1
60	1			1	1	1
61	1			1	1	1
62	1			1	1	1
63	1			1	1	1
64	1			1	1	1
65	1			1	1	1
66	1			1	1	1
67	1			1	1	1
68	1			1	1	1
69	1			1	1	1
70	1			1	1	1
71	1			1	1	1
72	1			1	1	1
73	1			1	1	1
74	1			1	1	1
75	1			1	1	1
76	1			1	1	1
77	1			1	1	1
78	1			1	1	1
79	1			1	1	1
80	1			1	1	1
81	1			1	1	1
82	1			1	1	1
83	1			1	1	1
84	1			1	1	1
85	1			1	1	1
86	1			1	1	1
87	1			1	1	1
88	1			1	1	1
89	1			1	1	1
90	1			1	1	1
91	1			1	1	1
92	1			1	1	1
93	1			1	1	1
94	1			1	1	1
95	1			1	1	1
96	1			1	1	1
97	1			1	1	1
98	1			1	1	1
99	1			1	1	1
100	1			1	1	1
101	1			1	1	1
102	1			1	1	1
103	1			1	1	1
104	1			1	1	1
105	1			1	1	1
106	1			1	1	1
107	1			1	1	1
108	1			1	1	1
109	1			1	1	1
110	1			1	1	1
111	1			1	1	1
112	1			1	1	1
113	1			1	1	1
114	1			1	1	1
115	1			1	1	1
116	1			1	1	1
117	1			1	1	1
118	1			1	1	1
119	1			1	1	1
120	1			1	1	1
121	1			1	1	1
122	1			1	1	1
123	1			1	1	1
124	1			1	1	1
125	1			1	1	1
126	1			1	1	1
127	1			1	1	1
128	1			1	1	1
129	1			1	1	1
130	1			1	1	1
131	1			1	1	1
132	1			1	1	1
133	1			1	1	1
134	1			1	1	1
135	1			1	1	1
136	1			1	1	1
137	1			1	1	1
138	1			1	1	1
139	1			1	1	1
140	1			1	1	1
141	1			1	1	1
142	1			1	1	1
143	1			1	1	1
144	1			1	1	1
145	1			1	1	1
146	1			1	1	1
147	1			1	1	1
148	1			1	1	1
149	1			1	1	1
150	1			1	1	1
151	1			1	1	1
152	1			1	1	1
153	1			1	1	1
154	1			1	1	1
155	1			1	1	1
156	1			1	1	1
157	1			1	1	1
158	1			1	1	1
159	1			1	1	1
160	1			1	1	1
161	1			1	1	1
162	1			1	1	1
163	1			1	1	1
164	1			1	1	1
165	1			1	1	1
166	1			1	1	1
167	1			1	1	1
168	1			1	1	1
169	1			1	1	1
170	1			1	1	1
171	1			1	1	1
172	1			1	1	1
173	1			1	1	1
174	1			1	1	1
175	1			1	1	1
176	1			1	1	1
177	1			1	1	1
178	1			1	1	1
179	1			1	1	1
180	1			1	1	1
181	1			1	1	1
182	1			1	1	1
183	1			1	1	1
184	1			1	1	1
185	1			1	1	1
186	1			1	1	1
187	1			1	1	1
188	1			1	1	1
189	1			1	1	1
190	1			1	1	1
191	1			1	1	1
192	1			1	1	1
193	1			1	1	1
194	1			1	1	1
195	1			1	1	1
196	1			1	1	1
197	1			1	1	1
198	1			1	1	1
199	1			1	1	1
200	1			1	1	1
201	1			1	1	1
202	1			1	1	1
203	1			1	1	1
204	1			1	1	1
205	1			1	1	1
206	1			1	1	1
207	1			1	1	1
208	1			1	1	1
209	1			1	1	1
210	1			1	1	1
211	1			1	1	1
212	1			1	1	1
213	1			1	1	1
214	1			1	1	1
215	1			1	1	1
216	1			1	1	1
217	1			1	1	1
218	1			1	1	1
219	1			1	1	1
220	1			1	1	1
221	1			1	1	1
222	1			1	1	1
223	1			1	1	1
224	1			1	1	1
225	1			1	1	1
226	1			1	1	1
227	1			1	1	1
228	1			1	1	1
229	1			1	1	1
230	1			1	1	1
231	1			1	1	1
232	1			1	1	1
233	1			1	1	1
234	1			1	1	1
235	1			1	1	1
236	1			1	1	1
237	1			1	1	1
238	1			1	1	1
239	1			1	1	1
240	1			1	1	1
241	1			1	1	1
242	1			1	1	1
243	1			1	1	1
244	1			1	1	1
245	1			1	1	1
246	1			1	1	1
247	1			1	1	1
248	1			1	1	1
249	1			1	1	1
250	1			1	1	1
251	1			1	1	1
252	1			1	1	1
253	1			1	1	1
254	1			1	1	1
255	1			1	1	1
256	1			1	1	1
257	1			1	1	1
258	1			1	1	1
259	1			1	1	1
260	1			1	1	1
261	1			1	1	1
262	1			1	1	1
263	1			1	1	1
264	1			1	1	1
265	1			1	1	1
266	1			1	1	1
267	1			1	1	1
268	1			1	1	1
269	1			1	1	1
270	1			1	1	1
271	1			1	1	1
272	1			1	1	1
273	1			1	1	1
274	1			1	1	1
275	1			1	1	1
276	1			1	1	1
277	1			1	1	1
278	1			1	1	1
279	1			1	1	1
280	1			1	1	1
281	1			1	1	1
282	1			1	1	1
283	1			1	1	1
284	1			1	1	1
285	1			1	1	1
286	1			1	1	1
287	1			1	1	1
288	1			1	1	1
289	1			1	1	1
290	1			1	1	1
291	1			1	1	1
292	1			1	1	1
293	1			1	1	1
294	1			1	1	1
295	1			1	1	1
296	1			1	1	1
297	1			1	1	1
298	1			1	1	1
299	1			1	1	1
300	1			1	1	1
301	1			1	1	1
302	1			1	1	1
303	1			1	1	1
304	1			1	1	1
305	1			1	1	1
306	1			1	1	1
307	1			1	1	1
308	1			1	1	1
309	1			1	1	1
310	1			1	1	1
311	1			1	1	1
312	1			1	1	1
313	1			1	1	1
314	1			1	1	1
315	1			1	1	1
316	1			1	1	1
317	1			1	1	1
318	1			1	1	1
319	1			1	1	1
320	1			1	1	1
321	1			1	1	1
322	1			1	1	1
323	1			1	1	1
324	1			1	1	1
325	1			1	1	1
326	1			1	1	1
327	1			1	1	1
328	1			1	1	1
329	1			1	1	1
330	1			1	1	1
331	1			1	1	1
332	1			1	1	1
333	1			1	1	1
334	1			1	1	1
335	1			1	1	1
336	1			1	1	1
337	1			1	1	1
338	1			1	1	1
339	1			1	1	1
340	1			1	1	1
341	1			1	1	1
342	1			1	1	1
343	1			1	1	1
344	1			1	1	1
345	1			1	1	1
346	1			1	1	1
347	1			1	1	1
348	1			1	1	1
349	1			1	1	1
350	1			1	1	1
351	1			1	1	1
352	1			1	1	1
353	1			1	1	1
354	1			1	1	1
355	1			1	1	1
356	1			1	1	1
357	1			1	1	1
358	1			1	1	1
359	1			1	1	1
360	1			1	1	1
361	1			1	1	1
362	1			1	1	1
363	1			1	1	1
364	1			1	1	1
365	1			1	1	1
366	1			1	1	1
367	1			1	1	1
368	1			1	1	1
369	1			1	1	1
370	1			1	1	1
371	1			1	1	1
372	1			1	1	1
373	1			1	1	1
374	1			1	1	1
375	1			1	1	1
376	1			1	1	1
377	1			1	1	1
378	1			1	1	1
379	1			1	1	1
380	1			1	1	1
381	1			1	1	1
382	1			1	1	1
383	1			1	1	1
384	1			1	1	1
385	1			1	1	1
386	1			1	1	1
387	1			1	1	1
388	1			1	1	1
389	1			1	1	1
390	1			1	1	1
391	1			1	1	1
392	1			1	1	1
393	1			1	1	1
394	1			1	1	1
395	1			1	1	1
396	1			1	1	1
397	1			1	1	1
398	1			1	1	1
399	1			1	1	1
400	1			1	1	1
401	1			1	1	1
402	1			1	1	1
403	1			1	1	1
404	1			1	1	1
405	1			1	1	1
406	1			1	1	1
407	1			1	1	1
408	1			1	1	1
409	1			1	1	1
410	1			1	1	1
411	1			1	1	1
412	1			1	1	1
413	1			1	1	1
414	1			1	1	1
415	1			1	1	1
416	1			1	1	1
417	1			1	1	1
418	1			1	1	1
419	1			1	1	1
420	1			1	1	1
421	1			1	1	1
422	1			1	1	1
423	1			1	1	1
424	1			1	1	1
425	1			1	1	1
426	1			1	1	1
427	1			1	1	1
428	1			1	1	1
429	1			1	1	1
430	1			1	1	1
431	1			1	1	1
432	1			1	1	1
433	1			1	1	1
434	1			1	1	1
435	1			1	1	1
436	1			1	1	1
437	1			1	1	1
438	1			1	1	1
439	1			1	1	1
440	1			1	1	1
441	1			1	1	1
442	1			1	1	1
443	1			1	1	1
444	1			1	1	1
445	1			1	1	1
446	1			1	1	1
447	1			1	1	1
448	1			1	1	1
449	1			1	1	1
450	1			1	1	1
451	1			1	1	1
452	1			1	1	1
453	1			1	1	1
454	1			1	1	1
455	1			1	1	1
456	1			1	1	1
457	1			1	1	1
458	1			1	1	1
459	1			1	1	1
460	1			1	1	1
461	1			1	1	1
462	1			1	1	1
463	1			2	1	1
464	1			2	1	1
465	1			2	1	1
466	1			2	1	1
467	1			2	1	1
468	1			2	1	1
469	1			2	1	1
470	1			2	1	1
471	1			2	1	1
472	1			2	1	1
473	1			2	1	1
474	1			2	1	1
475	1			2	1	1
476	2			2	1	1
477	2			2	1	1
478	2			2	1	1
479	2			2	1	1
480	2			2	1	1
481	2			2	1	1
482	2			2	1	1
483	2			2	1	1
484	2			2	1	1
485	2			2	1	1
486	2			2	1	1
487	2			2	1	1
488	2			2	1	1
489	2			2	1	1
490	2			2	1	1
491	2			2	1	1
492	2			2	1	1
493	2			2	1	1
494	2			2	1	1
495	2			2	1	1
496	2			2	1	1
497	2			2	1	1
498	2			2	1	1
499	2			2	1	1
500	2			2	1	1
501	2			2	1	1
502	2			2	1	1
503	2			2	1	1
504	2			2	1	1
505	2			2	1	1
506	2			2	1	1
507	2			2	1	1
508	2			2	1	1
509	2			2	1	1
510	2			2	1	1
511	2			2	1	1
512	2			2	1	1
513	2			2	1	1
514	2			2	1	1
515	2			2	1	1
516	2			2	1	1
517	2			2	1	1
518	2			2	1	1
519	2			2	1	1
520	2			2	1	1
521	2			2	1	1
522	2			2	1	1
523	2			2	1	1
524	2			2	1	1
525	2			2	1	1
526	2			2	1	1
527	2			2	1	1
528	2			2	1	1
529	2			2	1	1
530	2			2	1	1
531	2			2	1	1
532	2			2	1	1
533	2			2	1	1
534	2			2	1	1
535	2			2	1	1
536	2			2	1	1
537	2			2	2	1
538	2			2	2	1
539	2			2	2	1
540	2			2	2	1
541	2			2	2	1
542	2			2	2	1
543	2			2	2	1
544	2			2	2	1
545	2			2	2	1
546	2			2	2	1
547	2			2	2	1
548	2			2	2	1
549	2			2	2	1
550	2			2	2	1
551	2			2	2	1
552	2			2	2	1
553	2			2	2	1
554	2			2	2	1
555	2			2	2	1
556	2			2	2	1
557	2			2	2	1
558	2			2	2	1
559	2			2	2	1
560	2			2	2	1
561	2			2	2	1
562	2			2	2	1
563	2			2	2	1
564	2			2	2	1
565	2			2	2	1
566	2			2	2	1
567	2			2	2	1
568	2			2	2	1
569	2			2	2	1
570	2			2	2	1
571	2			2	2	1
572	2			2	2	1
573	2			2	2	1
574	2			2	2	1
575	2			2	2	1
576	2			2	2	1
577	2			2	2	1
578	2			2	2	1
579	2			2	2	1
580	2			2	2	1
581	2			2	2	1
582	2			2	2	1
583	2			2	2	1
584	2			2	2	1
585	2			2	2	1
586	2			2	2	1
587	2			2	2	1
588	2			2	2	1
589	2			2	2	1
590	2			2	2	1
591	2			2	2	1
592	2			2	2	1
593	2			2	2	1
594	2			2	2	1
595	2			2	2	1
596	2			2	2	1
597	2			2	2	1
598	2			2	2	1
599	2			2	2	1
600	2	2	2	2	2	1
601	2	2	2	2	2	1
602	2	2	2	2	2	1
603	2	2	2	2	2	1
604	2	2	2	4	2	1
605	2	2	2	4	2	1
606	2	2	2	4	2	1
607	2	2	2	4	2	1
608	2	2	2	4	2	1
609	2	2	2	4	2	1
610	2	2	2	4	2	1
611	2	2	2	4	2	1
612	2	2	4	4	2	1
613	2	2	4	4	2	1
614	2	2	4	4	2	1
615	2	2	4	4	2	1
616	2	2	4	4	2	1
617	2	2	4	4	2	1
618	2	2	4	4	2	1
619	2	2	4	4	2	1
620	2	2	4	4	2	1
621	2	2	4	4	2	1
622	2	2	4	4	2	1
623	2	2	4	4	2	1
624	2	2	4	4	2	1
625	2	2	4	4	2	1
626	4	2	4	4	2	1
627	4	2	4	4	2	1
628	4	2	4	4	2	1
629	4	2	4	4	2	1
630	4	2	4	4	2	1
631	4	2	4	4	2	1
632	4	2	4	4	2	1
633	4	2	4	4	2	1
634	4	2	4	4	2	1
635	4	2	4	4	2	1
636	4	2	4	4	2	1
637	4	2	4	4	2	1
638	4	2	4	4	2	1
639	4	2	4	4	2	1
640	4	2	4	4	2	1
641	4	2	4	4	2	1
642	4	2	4	4	2	1
643	4	2	4	4	2	1
644	4	2	4	4	2	1
645	4	2	4	4	2	1
646	4	2	4	4	2	1
647	4	2	4	4	2	1
648	4	2	4	4	2	1
649	4	2	4	4	2	1
650	4	2	4	4	2	1
651	4	2	4	4	2	1
652	4	2	4	4	2	1
653	4	2	4	4	2	1
654	4	2	4	4	2	1
655	4	2	4	4	2	1
656	4	2	4	4	2	1
657	4	2	4	4	2	1
658	4	2	4	4	2	1
659	4	2	4	4	2	1
660	4	2	4	4	2	1
661	4	2	4	4	2	1
662	4	2	4	4	2	1
663	4	2	4	4	2	1
664	4	2	4	4	2	1
665	4	2	4	4	2	1
666	4	2	4	4	2	1
667	4	2	4	4	2	1
668	4	2	4	4	2	1
669	4	2	4	4	2	1
670	4	2	4	4	2	1
671	4	2	4	4	2	1
672	4	2	4	4	2	2
673	4	2	4	4	2	2
674	4	2	4	4	2	2
675	4	2	4	4	2	2
676	4	2	4	4	2	2
677	4	2	4	4	2	2
678	4	2	4	4	2	2
679	4	2	4	4	2	2
680	4	2	4	4	2	2
681	4	2	4	4	2	2
682	4	2	4	4	2	2
683	4	2	4	4	2	2
684	4	2	4	4	2	2
685	4	2	4	4	2	2
686	4	2	4	4	2	2
687	4	2	4	4	2	2
688	4	2	4	4	2	2
689	4	2	4	4	2	2
690	4	2	4	4	2	2
691	4	4	4	4	2	2
692	4	4	4	4	2	2
693	4	4	4	4	2	2
694	4	4	4	4	2	2
695	4	4	4	4	2	2
696	4	4	4	4	2	2
697	4	4	4	4	2	2
698	4	4	4	4	2	2
699	4	4	4	4	2	2
700	4	4	4	4	2	2
701	4	4	4	4	4	2
702	4	4	4	4	4	2
703	4	4	4	4	4	2
704	4	4	4	4	4	2
705	4	4	4	4	4	2
706	4	4	4	4	4	2
707	4	4	4	4	4	2
708	4	4	4	4	4	2
709	4	4	4	4	4	2
710	4	4	4	4	4	2
711	4	4	4	4	4	2
712	4	4	4	4	4	2
713	4	4	4	4	4	2
714	4	4	4	4	4	2
715	4	4	4	4	4	2
716	4	4	4	4	4	2
717	4	4	4	4	4	2
718	4	4	4	4	4	2
719	4	4	4	4	4	2
720	4	4	4	4	4	2
721	4	4	4	4	4	2
722	4	4	4	4	4	2
723	4	4	4	4	4	2
724	4	4	4	4	4	2
725	4	4	4	4	4	2
726	4	4	4	4	4	2
727	4	4	4	4	4	2
728	4	4	4	4	4	2
729	4	4	4	4	4	2
730	4	4	4	4	4	2
731	4	4	4	4	4	2
732	4	4	4	4	4	2
733	4	4	4	4	4	2
734	4	4	4	4	4	2
735	4	4	4	8	4	2
736	4	4	4	8	4	2
737	4	4	4	8	4	2
738	4	4	4	8	4	2
739	4	4	4	8	4	2
740	4	4	4	8	4	2
741	4	4	4	8	4	2
742	4	4	4	8	4	2
743	4	4	4	8	4	2
744	4	4	4	8	4	2
745	4	4	4	8	4	2
746	4	4	8	8	4	2
747	4	4	8	8	4	2
748	4	4	8	8	4	2
749	4	4	8	8	4	2
750	4	4	8	8	4	2
751	4	4	8	8	4	2
752	4	4	8	8	4	2
753	4	4	8	8	4	2
754	4	4	8	8	4	2
755	4	4	8	8	4	2
756	4	4	8	8	4	2
757	4	4	8	8	4	2
758	4	4	8	8	4	2
759	4	4	8	8	4	2
760	4	4	8	8	4	2
761	4	4	8	8	4	2
762	4	4	8	8	4	2
763	4	4	8	8	4	2
764	4	4	8	8	4	2
765	4	4	8	8	4	2
766	4	4	8	8	4	2
767	4	4	8	8	4	2
768	4	4	8	8	4	2
769	4	4	8	8	4	2
770	4	4	8	8	4	2
771	4	4	8	8	4	2
772	4	4	8	8	4	2
773	4	4	8	8	4	2
774	4	4	8	8	4	2
775	4	4	8	8	4	2
776	4	4	8	8	4	2
777	4	4	8	8	4	2
778	4	4	8	8	4	2
779	4	4	8	8	4	2
780	4	4	8	8	4	2
781	4	4	8	8	4	2
782	4	4	8	8	4	2
783	4	4	8	8	4	2
784	4	4	8	8	4	2
785	4	4	8	8	4	2
786	4	4	8	8	4	2
787	4	4	8	8	4	2
788	4	4	8	8	4	2
789	4	4	8	8	4	2
790	4	4	8	8	4	2
791	4	4	8	8	4	2
792	4	4	8	8	4	2
793	4	4	8	8	4	2
794	4	4	8	8	4	2
795	4	4	8	8	4	2
796	4	4	8	8	4	2
797	4	4	8	8	4	2
798	4	4	8	8	4	2
799	4	4	8	8	4	2
800	4	4	8	8	4	2
801	4	4	8	8	4	2
802	4	8	8	8	4	2
803	4	8	8	8	4	2
804	4	8	8	8	4	2
805	4	8	8	8	4	2
806	4	8	8	8	4	2
807	4	8	8	8	4	2
808	4	8	8	8	4	2
809	4	8	8	8	4	2
810	4	8	8	8	4	2
811	4	8	8	8	4	2
812	4	8	8	8	4	2
813	4	8	8	8	4	2
814	4	8	8	8	4	2
815	4	8	8	8	4	2
816	4	8	8	8	4	2
817	4	8	8	8	4	2
818	4	8	8	8	4	2
819	4	8	8	8	4	2
820	4	8	8	8	4	2
821	4	8	8	8	4	2
822	4	8	8	8	4	2
823	8	8	8	8	4	2
824	8	8	8	8	4	2
825	8	8	8	8	4	2
826	8	8	8	8	4	2
827	8	8	8	8	4	2
828	8	8	8	8	4	2
829	8	8	8	8	4	2
830	8	8	8	8	4	2
831	8	8	8	8	4	2
832	8	8	8	8	4	2
833	8	8	8	8	4	2
834	8	8	8	8	4	2
835	8	8	8	8	4	2
836	8	8	8	8	4	2
837	8	8	8	8	7	2
838	8	8	8	8	8	2
839	8	8	8	8	8	2
840	8	8	8	8	8	2
841	8	8	8	8	8	2
842	8	8	8	8	8	2
843	8	8	8	8	8	2
844	8	8	8	8	8	2
845	8	8	8	8	8	2
846	8	8	8	8	8	2
847	8	8	8	8	8	2
848	8	8	8	8	8	2
849	8	8	8	8	8	2
850	8	8	8	8	8	2
851	8	8	8	8	8	2
852	8	8	8	8	8	2
853	8	8	8	8	8	2
854	8	8	8	8	8	2
855	8	8	8	8	8	2
856	8	8	8	8	8	2
857	8	8	8	8	8	2
858	8	8	8	8	8	2
859	8	8	8	8	8	2
860	8	8	8	8	8	2
861	8	8	8	8	8	2
862	8	8	8	8	8	2
863	8	8	8	8	8	2
864	8	8	8	12	8	4
865	8	8	8	14	8	4
866	8	8	8	16	8	4
867	8	8	8	16	8	4
868	8	8	8	16	8	4
869	8	8	8	16	8	4
870	8	8	8	16	8	4
871	8	8	8	16	8	4
872	8	8	8	16	8	4
873	8	8	8	16	8	4
874	8	8	8	16	8	4
875	8	8	8	16	8	4
876	8	8	8	16	8	4
877	8	8	8	16	8	4
878	8	8	8	16	8	4
879	8	8	8	16	8	4
880	8	8	8	16	8	4
881	8	8	8	16	8	4
882	8	8	8	16	8	4
883	8	8	8	16	8	4
884	8	8	8	16	8	4
885	8	8	8	16	8	4
886	8	8	8	16	8	4
887	8	8	8	16	8	4
888	8	8	8	16	8	4
889	8	8	8	16	8	4
890	8	8	8	16	8	4
891	8	8	8	16	8	4
892	8	8	8	16	8	4
893	8	8	8	16	8	4
894	8	8	8	16	8	4
895	8	8	8	16	8	4
896	8	8	8	16	8	4
897	8	8	8	16	8	4
898	8	8	8	16	8	4
899	8	8	8	16	8	4
900	8	8	8	16	8	4
901	8	8	8	16	8	4
902	8	8	8	16	8	4
903	8	8	8	16	8	4
904	8	8	8	16	8	4
905	8	8	8	16	8	4
906	8	8	16	16	8	4
907	8	8	16	16	8	4
908	8	8	16	16	8	4
909	8	8	16	16	8	4
910	8	8	16	16	8	4
911	8	8	16	16	8	4
912	8	8	16	16	8	4
913	8	8	16	16	8	4
914	8	8	16	16	8	4
915	8	8	16	16	8	4
916	8	8	16	16	8	4
917	8	8	16	16	8	4
918	8	8	16	16	8	4
919	8	8	16	16	8	4
920	8	8	16	16	8	4
921	8	8	16	16	8	4
922	8	8	16	16	8	4
923	8	8	16	16	8	4
924	8	8	16	16	8	4
925	8	8	16	16	8	4
926	8	8	16	16	8	4
927	8	8	16	16	8	4
928	8	8	16	16	8	4
929	8	8	16	16	8	4
930	8	8	16	16	8	4
931	8	8	16	16	8	4
932	8	8	16	16	8	4
933	8	8	16	16	8	4
934	8	8	16	16	8	4
935	8	8	16	16	8	4
936	8	8	16	16	8	4
937	8	8	16	16	8	4
938	8	8	16	16	8	4
939	8	8	16	16	8	4
940	8	8	16	16	8	4
941	8	8	16	16	8	4
942	8	8	16	16	8	4
943	8	8	16	16	8	4
944	8	8	16	16	8	4
945	8	8	16	16	8	4
946	8	8	16	16	8	4
947	8	8	16	16	8	4
948	8	8	16	16	8	4
949	8	8	16	16	8	4
950	8	8	16	16	8	4
951	8	8	16	16	8	4
952	8	8	16	16	8	4
953	8	8	16	16	8	4
954	8	8	16	16	8	4
955	8	8	16	16	8	4
956	8	8	16	16	8	4
957	8	8	16	16	8	4
958	8	8	16	16	8	4
959	8	8	16	16	8	4
960	8	8	16	16	8	4
961	8	8	16	16	8	4
962	8	8	16	16	8	4
963	8	8	16	16	8	4
964	8	8	16	16	8	4
965	8	8	16	16	8	4
966	8	15	16	16	8	4
967	8	16	16	16	8	4
968	8	16	16	16	8	4
969	8	16	16	16	8	4
970	8	16	16	16	8	4
971	8	16	16	16	8	4
972	8	16	16	16	8	4
973	8	16	16	16	8	4
974	8	16	16	16	8	4
975	8	16	16	16	8	4
976	8	16	16	16	8	4
977	8	16	16	16	8	4
978	8	16	16	16	8	4
979	8	16	16	16	8	4
980	8	16	16	16	8	4
981	8	16	16	16	8	4
982	8	16	16	16	8	4
983	8	16	16	16	8	4
984	8	16	16	16	8	4
985	8	16	16	16	8	4
986	8	16	16	16	8	4
987	8	16	16	16	8	4
988	8	16	16	16	8	4
989	8	16	16	16	8	4
990	8	16	16	16	8	4
991	8	16	16	16	8	4
992	8	16	16	16	8	4
993	8	16	16	16	8	4
994	8	16	16	16	8	4
995	8	16	16	16	8	4
996	8	16	16	16	8	4
997	8	16	16	16	8	4
998	8	16	16	16	8	4
999	8	16	16	16	8	4
1000	8	16	16	16	8	4
1001	8	16	16	16	8	4
1002	8	16	16	16	8	4
1003	8	16	16	16	8	4
1004	8	16	16	16	8	4
1005	8	16	16	16	8	4
1006	8	16	16	16	8	4
1007	8	16	16	16	8	4
1008	8	16	16	16	8	4
1009	8	16	16	16	8	4
1010	8	16	16	16	8	4
1011	8	16	16	16	8	4
1012	8	16	16	16	8	4
1013	8	16	16	16	8	4
1014	8	16	16	16	8	4
1015	8	16	16	16	8	4
1016	8	16	16	16	8	4
1017	8	16	16	16	8	4
1018	8	16	16	16	8	4
1019	8	16	16	16	8	4
1020	8	16	16	16	8	4
1021	8	16	16	16	8	4
1022	8	16	16	16	8	4
1023	8	16	16	16	8	4
1024	8	16	16	16	8	4
1025	8	16	16	16	8	4
1026	8	16	16	16	8	4
1027	8	16	16	16	8	4
1028	8	16	16	16	8	4
1029	8	16	16	16	8	4
1030	8	16	16	16	8	4
1031	8	16	16	16	8	4
1032	8	16	16	16	8	4
1033	8	16	16	16	8	4
1034	8	16	16	16	8	4
1035	8	16	16	16	8	4
1036	8	16	16	16	8	4
1037	8	16	16	16	8	4
1038	8	16	16	16	8	4
1039	8	16	16	16	8	4
1040	8	16	16	16	8	4
1041	8	16	16	16	8	4
1042	8	16	16	16	8	4
1043	8	16	16	16	8	4
1044	8	16	16	16	8	4
1045	8	16	16	16	8	4
1046	8	16	16	16	8	4
1047	8	16	16	16	8	4
1048	8	16	16	16	8	4
1049	8	16	16	16	8	4
1050	8	16	16	16	8	4
1051	8	16	16	16	8	4
1052	8	16	16	16	8	8
1053	8	16	16	16	8	8
1054	8	16	16	16	8	8
1055	8	16	16	16	8	8
1056	14	16	16	16	8	8
1057	16	16	16	16	8	8
1058	16	16	16	16	8	8
1059	16	16	16	16	8	8
